# Supplementary material for: pH-Sensitive perylene tetra-(alkoxycarbonyl) probes for live cell imaging
Source: Royal Society of Chemistry journal article supplement (doi:10.1039/c6nj00153j), 2016-01-01
Supplement: c6nj00153j1.pdf [file c6nj00153j1.pdf]

# **Electronic Supplementary Information (ESI) for pH-sensitive perylene tetra-(alkoxycarbonyl) probes for live cell imaging**

Yongshan Ma <sup>a, b, c</sup>, Jiaofu Li <sup>a</sup>, Shuguo Hou <sup>b, c</sup>, Jinfeng Zhang <sup>b</sup>, Zhiqiang Shi <sup>\*a</sup>, Tianyi Jiang <sup>b, c</sup>  
and Xiaofeng Wei <sup>b</sup>

<sup>a</sup>Department of Chemistry, Shandong Normal University, 88 Wenhua Donglu Road, Jinan 250014,  
P. R. China. E-mail address: zshi@sdsu.edu.cn. Tel.: +86 531 86182540; fax: +86 531 82615258.

<sup>b</sup>School of Municipal and Environmental Engineering, Shandong Jianzhu University, Jinan  
250101, P. R. China.

<sup>c</sup>Co-Innovation Center of Green Building, Jinan 250101, P. R. China.

## **Table of Contents**

|                                                                         |            |
|-------------------------------------------------------------------------|------------|
| <b>General Experimental Section</b>                                     | <b>S2</b>  |
| <b>Characterization Data</b>                                            | <b>S3</b>  |
| <b>Copies of (1H &amp; 13C) NMR, FTIR and MS Spectra</b>                | <b>S5</b>  |
| <b>Cell cytotoxic effect of HPTBAC on Human Lung Cancer A549 Cells.</b> | <b>S10</b> |

## **General Experimental Section**

All chemicals and solvents were of analytical grade, obtained from commercial sources and used without further purification.  $^1\text{H}$  NMR and  $^{13}\text{C}$  NMR were recorded on a Bruker 300 MHz spectrometer (Bruker, Germany) in the solvent  $\text{CDCl}_3$  with tetramethylsilane (TMS) as an internal standard. Infrared spectra were obtained through TENSOR27 Fourier transform FT-IR spectrophotometer (Bruker, Germany). Mass spectra data were taken on a Finnigan ESI instrument (Thermo, America). Absorption spectra were measured on a CARY50 UV-vis spectrophotometer (Varian, America). Fluorescence spectra measurements were performed on an FL4500 PC fluorescence spectrophotometer (Hitachi, Japan). Fluorescent images were taken on a BH2 fluorescence microscope (Olympus, Japan). The pH values were measured with a PB-10 pH meter (Beijing Sartorius Device Works, Beijing, China).

## Characteristic Data

### 3,4,9,10-Tetra (n-butoxyloxycarbonyl) perylene (PTBAC).

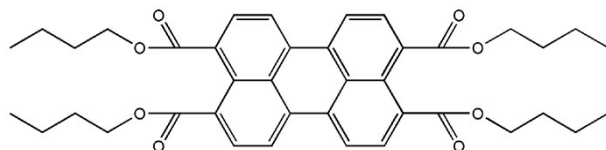

Yield: 4.58g (70%). Yellow solid.  $^1\text{H}$  NMR (300 MHz,  $\text{CDCl}_3$ )  $\delta$ : 8.08 (d,  $J=7.9\text{Hz}$ , 4H), 7.93 (d,  $J=7.9\text{Hz}$ , 4H), 4.39 (d, 8H), 1.87 (m, 8H), 1.59 (m, 8H), 1.02 (m, 12H).  $^{13}\text{C}$  NMR (75 MHz,  $\text{CDCl}_3$ , ppm)  $\delta$ : 168.51, 132.78, 130.35, 130.26, 128.81, 126.62, 121.26, 65.29, 53.39, 30.68, 19.28, 13.78. FT-IR (KBr,  $\text{cm}^{-1}$ ):  $\nu$  = 2952, 2868, 2109, 1893, 1714, 1584, 1511, 1469, 1405, 1266, 1164, 1128, 1097, 1032, 939, 890, 841, 803, 743, 588, 507, 436. MALDI-TOF MS: calcd 652.3; found, 652.3046 ( $\text{M} + \text{Na}^+$ ). Elemental analysis: Calculated for  $\text{C}_{40}\text{H}_{44}\text{O}_8$  C 73.60, H 6.79, O 19.61%; found C 73.48, H 6.43, O 19.82%.

### 1-nitro-perylene-3,4,9,10-tetra (n-butoxyloxycarbonyl) perylene (NPTBAC).

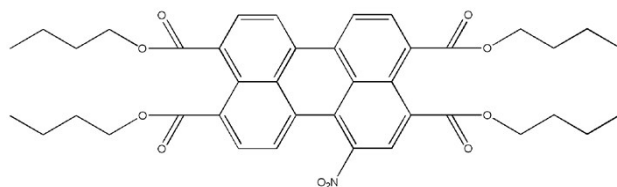

Yield: 0.9g (86%). Red solid.  $^1\text{H}$ -NMR(300 MHz,  $\text{CDCl}_3$ , ppm):  $\delta$ =8.40 (s, 1H), 8.37 (m, 2H), 8.26 (d, 1H), 8.14 (d, 1H,  $J=6$  Hz), 7.97 (d, 1H,  $J=6$  Hz), 7.93 (d, 1H,  $J=9$  Hz), 4.37 (m, 8H), 1.82 (m, 8H), 1.55 (m, 8H), 1.03 (m, 12H).  $^{13}\text{C}$  NMR (75 MHz,  $\text{CDCl}_3$ , ppm)  $\delta$ : 168.06, 167.86, 167.79, 166.60, 146.32, 133.91, 132.53, 131.96, 131.61, 130.83, 130.51, 130.38, 130.00, 129.15, 128.73, 128.48, 127.92, 127.40, 126.63, 125.62, 123.13, 122.61, 66.02, 65.64, 65.58, 30.60, 19.23, 13.74. FT-IR (KBr,  $\text{cm}^{-1}$ ):  $\nu$  = 2959, 2871, 1711, 1589, 1529, 1460, 1394, 1353, 1274, 1249, 1163, 1108, 1062, 1021, 959, 899, 846, 801, 736, 702, 604, 506, 434. MALDI-TOF MS: calcd 697.29; found, 697.2913 ( $\text{M} + \text{Na}^+$ ). Elemental analysis: Calculated for  $\text{C}_{40}\text{H}_{43}\text{NO}_{10}$  C 68.85, H 6.21, N 2.01, O 22.93%; found C 68.75, H 6.33, O 22.87%.

### 1- hydroxyl-3,4,9,10-tetra(n-butoxyloxycarbonyl) perylene (HPTBAC).

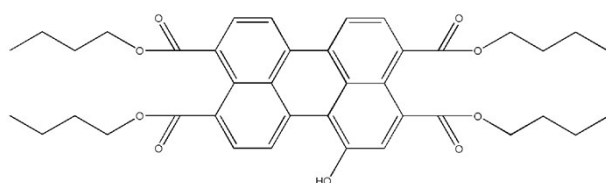

Yield: 52 mg (79%). Red solid.  $^1\text{H}$ -NMR ( $\text{CHCl}_3$ , TMS, ppm):  $\delta$  = 10.67 (s, 1H), 9.34 (d, 1H), 8.25 (d, 1H), 7.99-7.95 (m, 3H), 7.84 (d, 1H), 7.82 (s, 1H), 4.23-4.17(m, 8H), 2.62-2.39(m, 8H), 1.71-1.64(m, 8H), 1.44-1.34(m, 12H).  $^{13}\text{C}$  NMR (75 MHz,  $\text{CDCl}_3$ , ppm):  $\delta$  = 168.78, 167.80, 167.71, 157.31, 144.10, 133.47, 132.33, 131.95, 131.82, 129.85,

129.30, 128.61, 127.65, 127.40, 126.34, 125.87, 125.64, 122.24, 120.78, 113.56, 80.00, 65.35, 65.27, 65.21, 30.66, 30.58, 19.25, 13.77. FT-IR (KBr,  $\text{cm}^{-1}$ ):  $\nu = 2957, 2928, 2870, 1708, 1588, 1514, 1460, 1406, 1344, 1271, 1196, 1160, 1063, 1024, 961, 939, 896, 837, 801, 750, 707, 580, 507, 438$ . MALDI-TOF MS: calcd 667.3; found, 667.29 ( $M + \text{Na}^+$ ). Elemental analysis: Calculated for  $\text{C}_{40}\text{H}_{44}\text{O}_9$  C 71.84, H 6.63, O 21.53%; found C 71.76, H 6.25, O 21.61%.

Copies of (1H & 13C) NMR, FTIR and MS Spectra

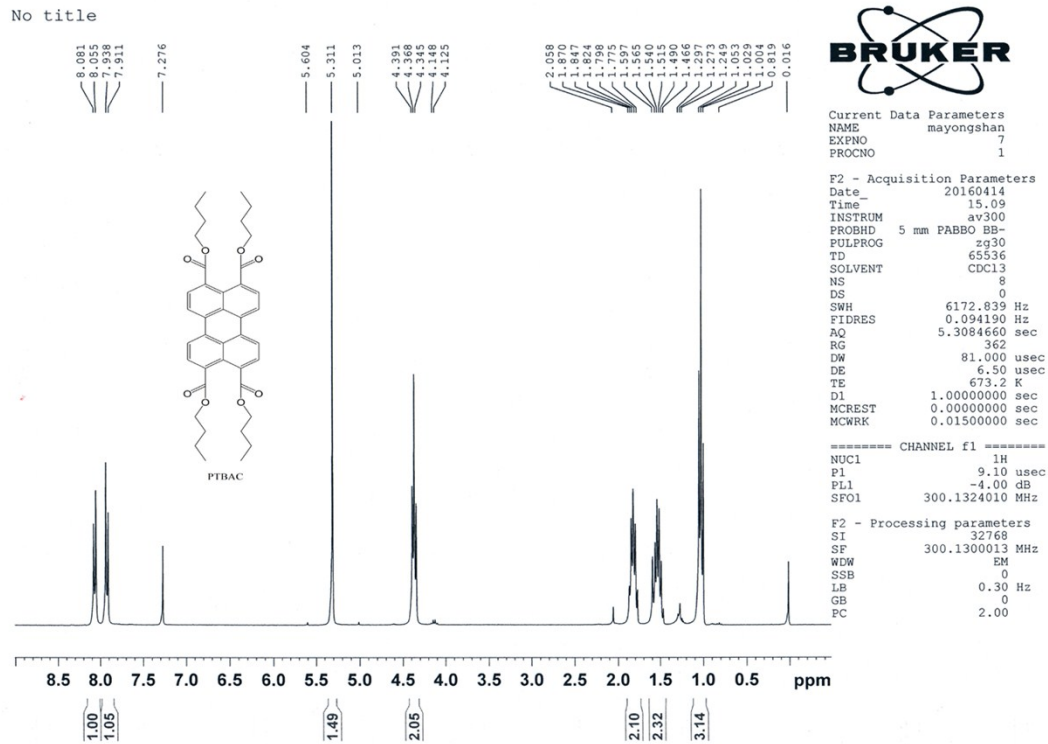

<sup>1</sup>H-NMR spectrum of PTBAC.

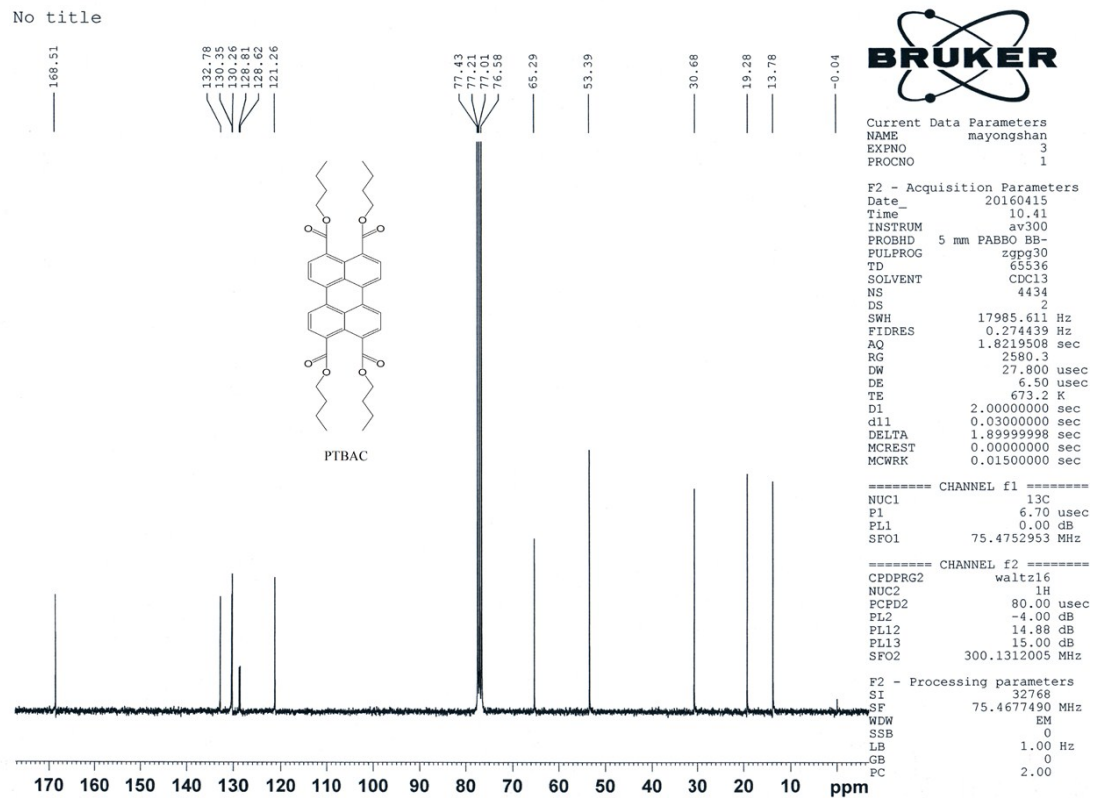

<sup>13</sup>C-NMR spectrum of PTBAC.

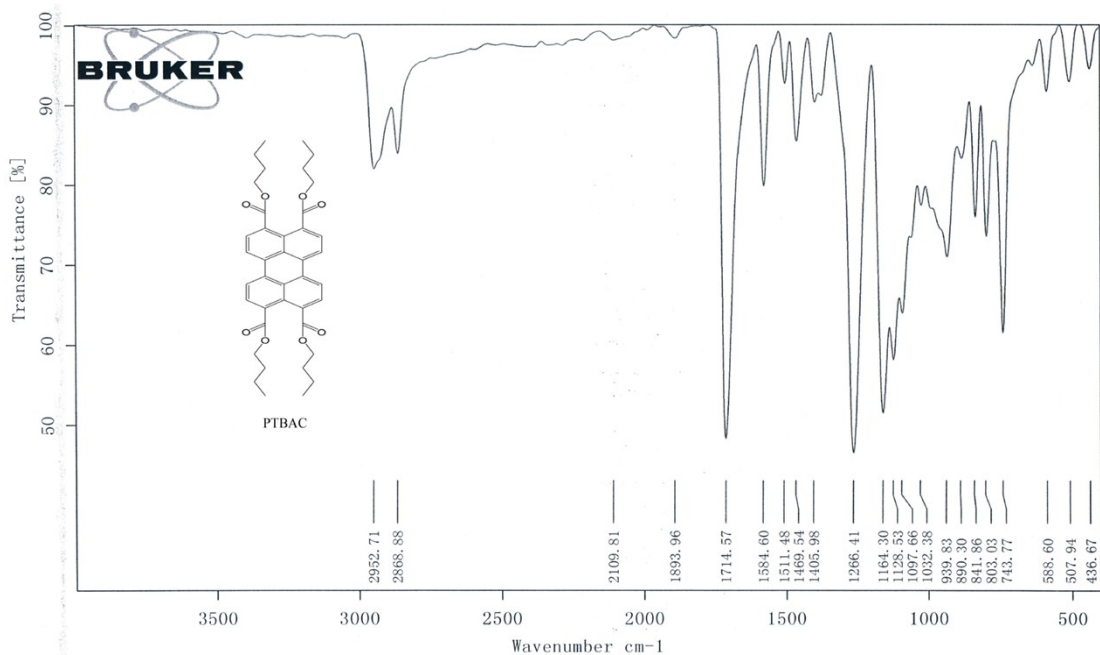

FTIR spectrum of PTBAC.

No title

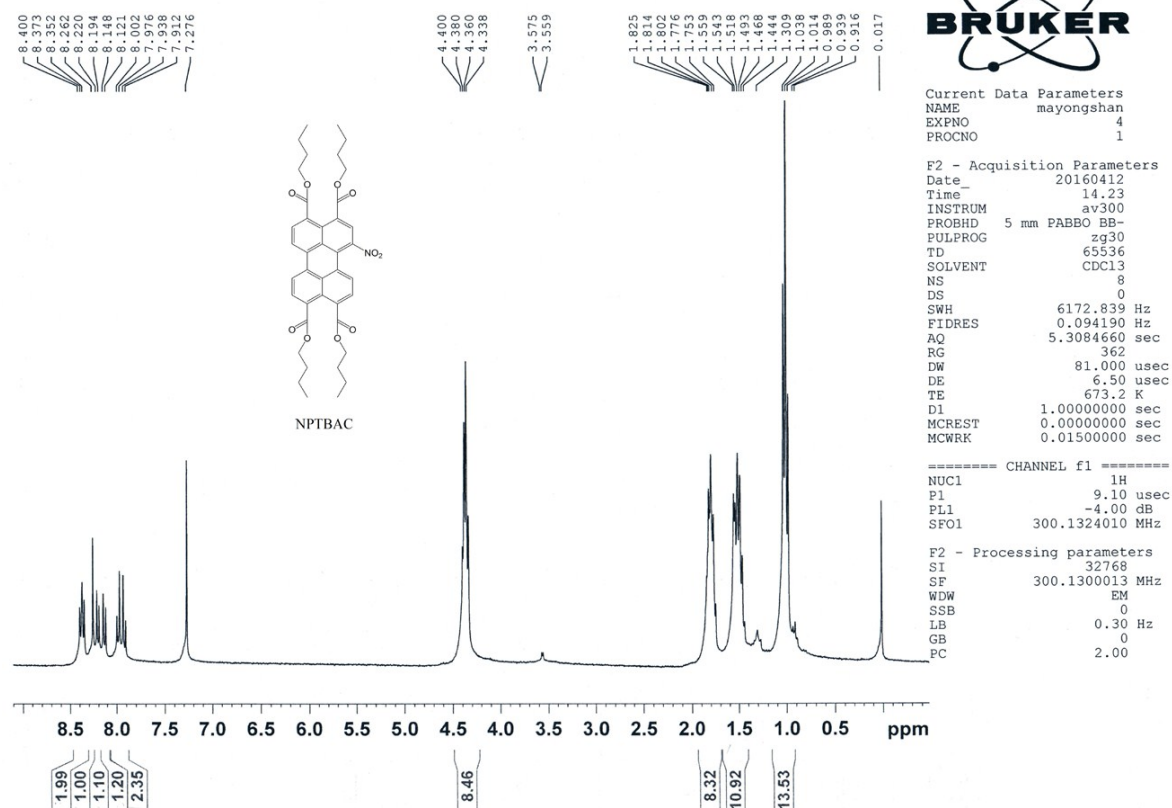

<sup>1</sup>H-NMR spectrum of NPTBAC.

No title

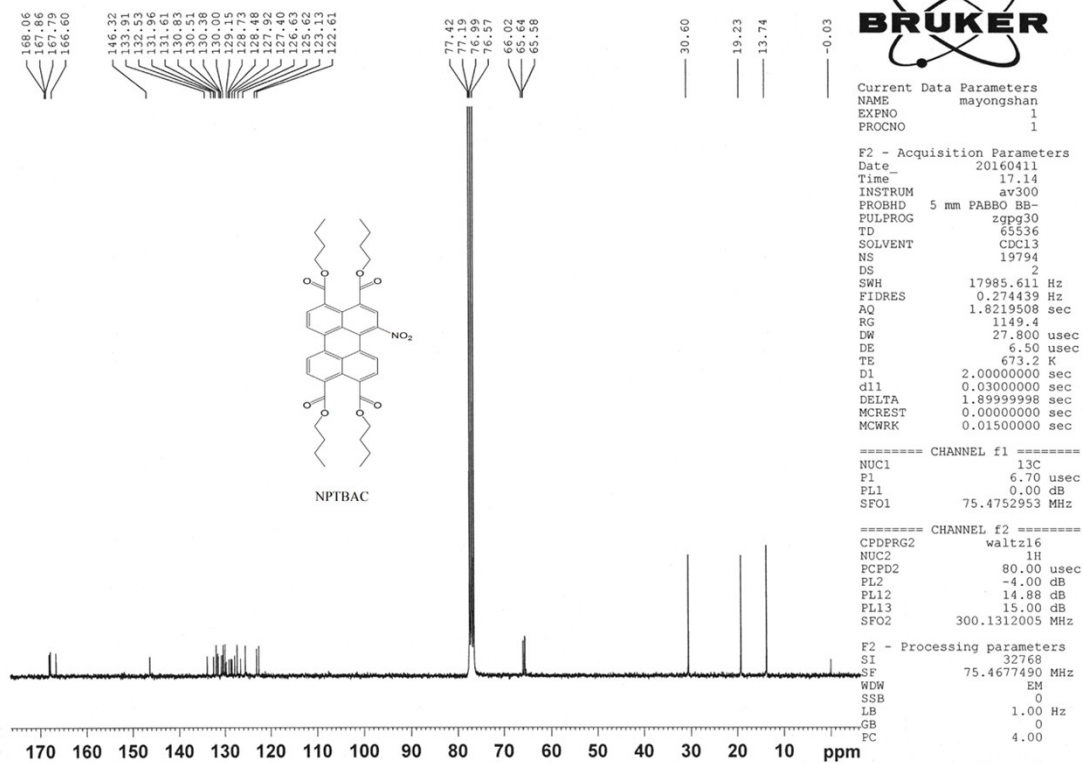

<sup>13</sup>C-NMR spectrum of NPTBAC.

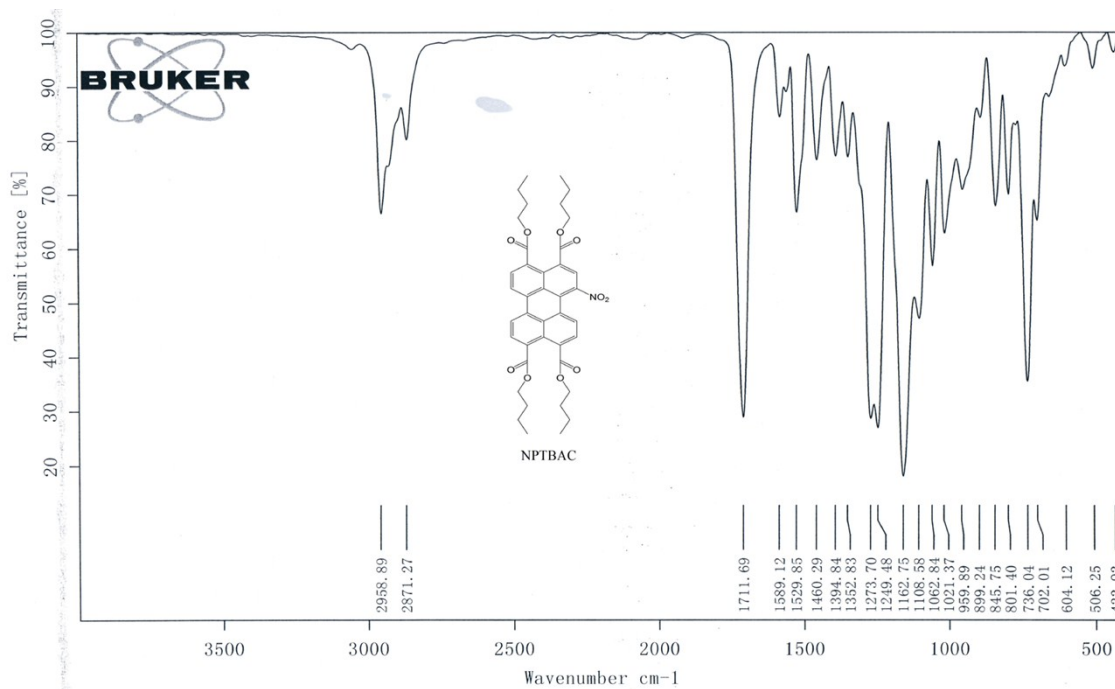

FTIR spectrum of NPTBAC.

No title

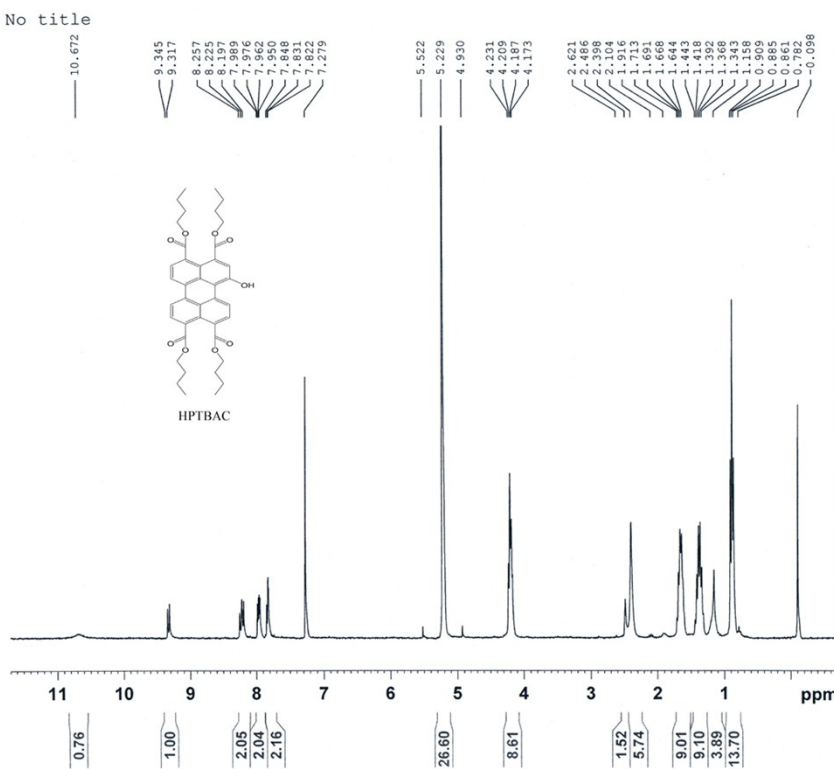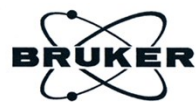

Current Data Parameters  
NAME mayongshan  
EXPNO 5  
PROCNO 1

F2 - Acquisition Parameters  
Date\_ 20160414  
Time\_ 14.58  
INSTRUM av300  
PROBHD 5 mm PABBO BB-  
PULPROG zg30  
TD 65536  
SOLVENT CDCl3  
NS 8  
DS 0  
SWH 6172.939 Hz  
FIDRES 0.094190 Hz  
AQ 5.3084660 sec  
RG 362  
DW 81.000 usec  
DE 6.50 usec  
TE 273.2 K  
D1 1.00000000 sec  
MCREST 0.00000000 sec  
MCWRK 0.01500000 sec

----- CHANNEL f1 -----  
NUC1 1H  
P1 9.10 usec  
PL1 -4.00 dB  
SFO1 300.1324010 MHz

F2 - Processing parameters  
SI 32768  
SF 300.1300013 MHz  
WDW EM  
SSB 0  
LB 0.30 Hz  
GB 0  
PC 2.00

<sup>1</sup>H-NMR spectrum of HPTBAC.

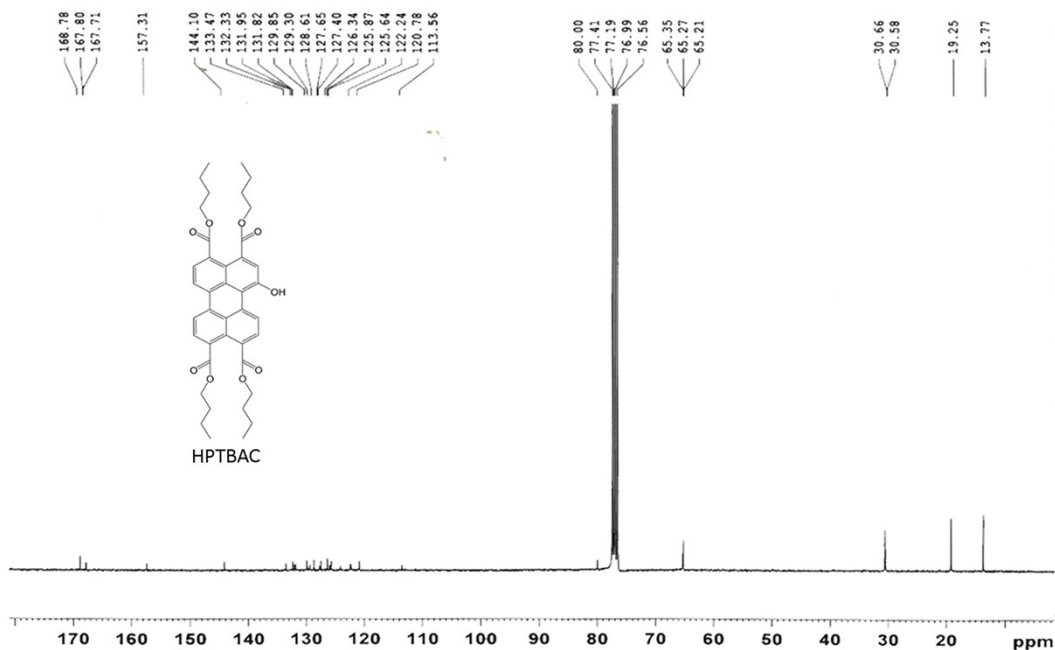

<sup>13</sup>C-NMR spectrum of HPTBAC.



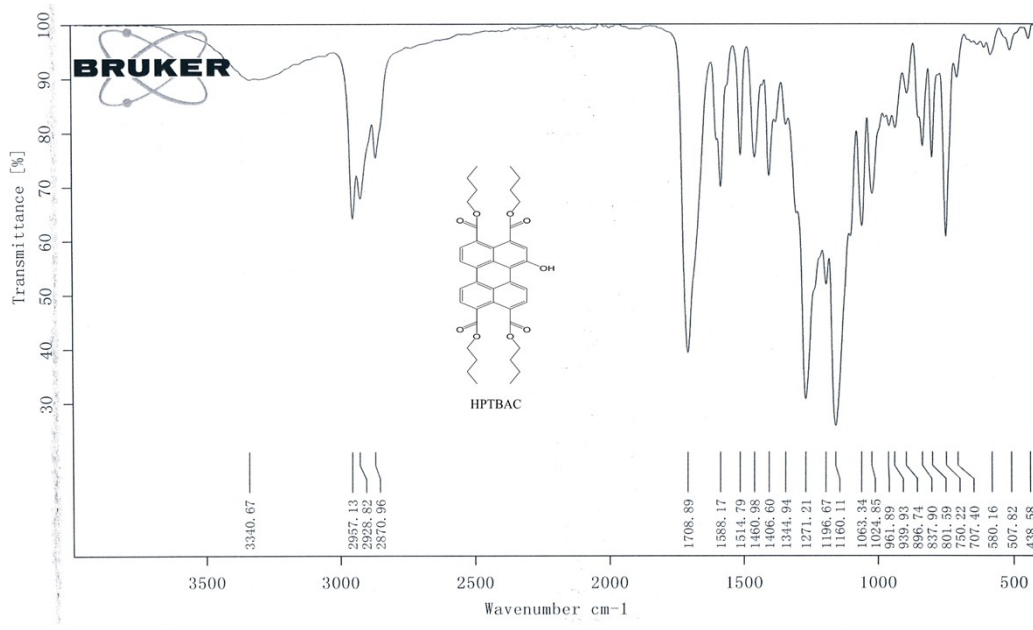

FTIR spectrum of HPTBAC.

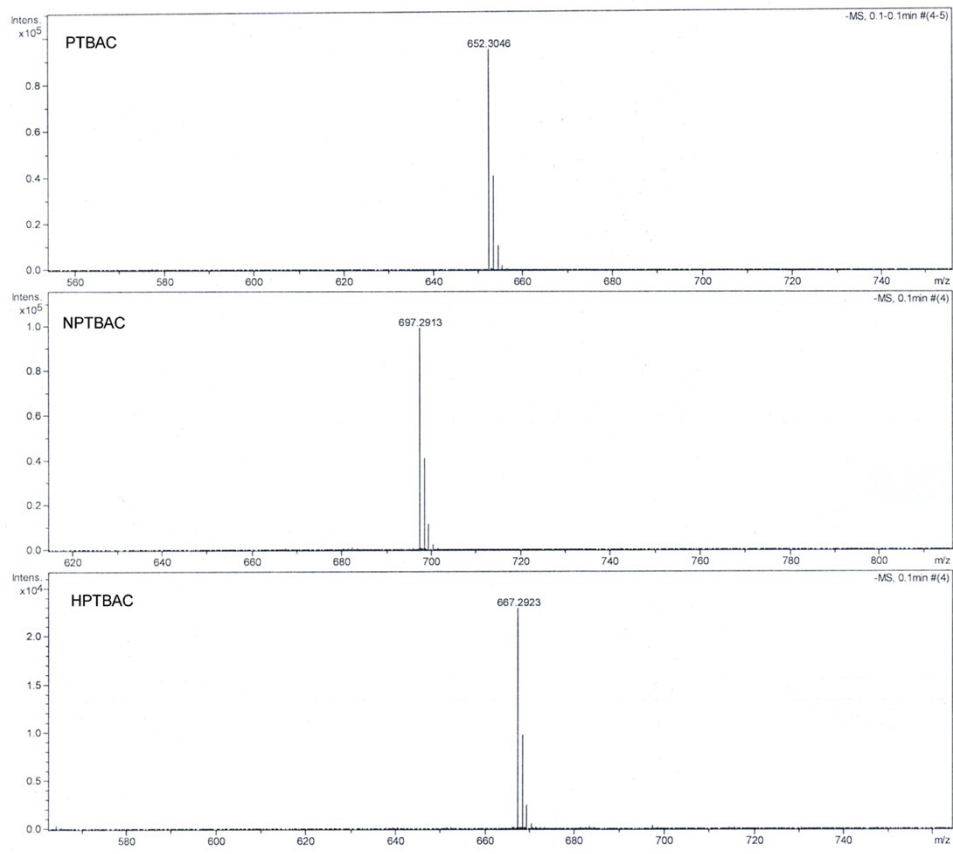

MS Spectra of PTBAC, NPTBAC and HPTBAC.

### Cell cytotoxic effect of HPTBAC on Human Lung Cancer A549 Cells.

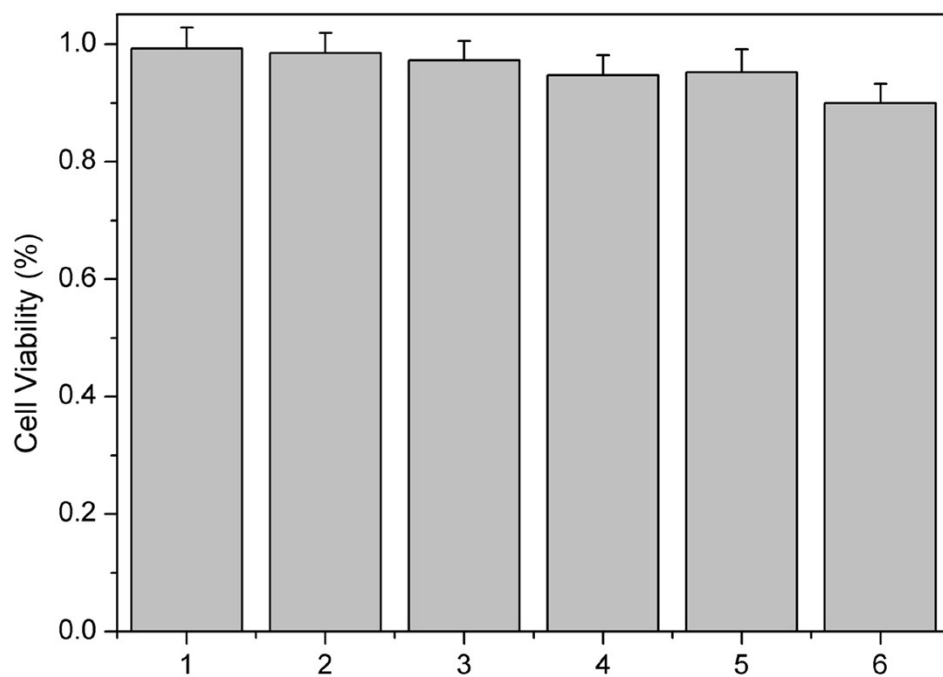

Cell cytotoxic effect of HPTBAC on Human Lung Cancer A549 Cells. 1, control; 2, 0.01 μM; 3, 0.1 μM; 4, 1 μM; 5, 10 μM; 6, 50 μM. Data are expressed as mean values standard error of the mean of five independent experiments.
